# Supplementary material for: Protocol for the SAFEST review: the Shock-Absorbing Flooring Effectiveness SysTematic review including older adults and staff in hospitals and care homes
Source: PubMed Central journal article supplement (PMC7044972; doi:10.1136/bmjopen-2019-032315), 2020-02-17
Supplement: bmjopen-2019-032315supp002.pdf [file bmjopen-2019-032315supp002.pdf]

**Medline search strategy**

| Search line | Terms                                                                                                                                 |
|-------------|---------------------------------------------------------------------------------------------------------------------------------------|
| 1           | MH "Wounds and Injuries+                                                                                                              |
| 2           | MH "Accidental Falls/PC"                                                                                                              |
| 3           | MH "Hip Fractures+/PC"                                                                                                                |
| 4           | falls                                                                                                                                 |
| 5           | faller\$                                                                                                                              |
| 6           | S1 OR S2 OR S3 OR S4 OR S5                                                                                                            |
| 7           | MH "Aged+"                                                                                                                            |
| 8           | MH "Middle Aged"                                                                                                                      |
| 9           | Older                                                                                                                                 |
| 10          | Senior\$                                                                                                                              |
| 11          | elderly                                                                                                                               |
| 12          | S7 OR S8 OR S9 OR S10 OR S11                                                                                                          |
| 13          | S6 AND S12                                                                                                                            |
| 14          | MH "Residential Facilities+"                                                                                                          |
| 15          | MH "Long-Term Care"                                                                                                                   |
| 16          | MH "Institutionalization"                                                                                                             |
| 17          | MH "Hospitalization"                                                                                                                  |
| 18          | MH "Subacute Care"                                                                                                                    |
| 19          | MH "Hospitals+"                                                                                                                       |
| 20          | MH "Hospital Units"                                                                                                                   |
| 21          | MH "Rehabilitation Centers"                                                                                                           |
| 22          | MH "Inpatients"                                                                                                                       |
| 23          | MH "Geriatric Assessment"                                                                                                             |
| 24          | ("long stay" or "long term" or "acute" or "sub-acute" or "subacute" or "residential" or "hospital") N3<br>(care or ward# or hospital) |
| 25          | (rehabilitation or geriatric) N1 (ward# or hospital# or unit# or department#)                                                         |
| 26          | hostel\$ or nursing home\$                                                                                                            |
| 27          | inpatient                                                                                                                             |
| 28          | resident\$                                                                                                                            |
| 29          | institution\$                                                                                                                         |
| 30          | S14 OR S15 OR S16 OR S17 OR S18 OR S19 OR S20 OR S21 OR S22 OR S23 OR S24 OR<br>S25 OR S26 OR S27 OR S28 OR S29                       |
| 31          | S13 and S30                                                                                                                           |
| 32          | floor* NOT (pelvic floor OR sinus OR mouth)                                                                                           |
| 33          | carpet*                                                                                                                               |
| 34          | ground surface\$                                                                                                                      |
| 35          | smartcell*                                                                                                                            |
| 36          | tarkett                                                                                                                               |
| 37          | softile                                                                                                                               |
| 38          | sorbashock                                                                                                                            |
| 39          | forbo                                                                                                                                 |
| 40          | kradal                                                                                                                                |
| 41          | noraplan                                                                                                                              |
| 42          | MH "Floors and Floorcoverings"                                                                                                        |
| 43          | S32 OR S33 OR S34 OR S35 OR S36 OR S37 OR S38 OR S39 OR S40 OR S41 OR S42                                                             |
| 44          | S31 AND S43                                                                                                                           |
| 45          | MH "Animals+"                                                                                                                         |
| 46          | MH "Humans"                                                                                                                           |
| 47          | S45 NOT S46                                                                                                                           |
| 48          | S44 NOT S47                                                                                                                           |
| 49          | S44 NOT S47<br>Limiters - Date of Publication: 20160501-                                                                              |
